# Supplementary material
Source: ML conference proceedings conference paper supplement (https://proceedings.neurips.cc/paper_files/paper/2023/hash/4661b55200c03a8c4bb9c2974b4fb12d-Abstract.html)
Supplement: Supplementary file 1 [file 4661b55200c03a8c4bb9c2974b4fb12d-Supplemental-Conference.pdf]

602 **Roadmap to the appendix**

603 Appendix A includes omitted material from the Model section from the main text. Appendix B  
 604 includes the proofs omitted from Section 3 (Offline Setting). Appendix C includes the proofs omitted  
 605 from Section 4 (Online Setting). Appendix D includes the equilibrium analysis. A few results from  
 606 prior work that we invoke are in Appendix E.

607 **A Appendix: Examples for the Model**

608 **Example 1.** Let  $K = 3$  and  $n = 2$ . Suppose the valuations are  $\mathbf{v}_1 = (5, 2)$  and  $\mathbf{v}_2 = (4, 1)$ . If the  
 609 players submit bids  $\mathbf{b}_1 = (2, 1)$  and  $\mathbf{b}_2 = (3, 2)$ , the bid are sorted in the order  $(b_{2,1}, b_{1,1}, b_{2,2}, b_{1,2})$ .  
 610 Then the allocation is  $x_1 = 1$  and  $x_2 = 2$ .

611 Under the  $K$ -th price auction, the price is set to  $p = b_{2,2} = 2$ . Then the utilities of the players are  
 612  $u_1(\mathbf{b}) = V_1(1) - p = 5 - 2 = 3$  and  $u_2(\mathbf{b}) = V_2(2) - 2 \cdot p = (4 + 1) - 2 \cdot 2 = 1$ .

613 Under the  $(K + 1)$ -st price auction, the price is set to  $p = b_{1,2} = 1$ . Then the utilities of the players  
 614 are  $u_1(\mathbf{b}) = V_1(1) - p = 5 - 1 = 4$  and  $u_2(\mathbf{b}) = V_2(2) - 2 \cdot p = (4 + 1) - 2 \cdot 1 = 3$ .

615 **B Appendix: Offline Setting**

616 In this section we include the proofs omitted from the main text for the offline setting.

617 **Observation 1 (restated).** Player  $i$  has an optimum bid vector  $\beta = (\beta_1, \dots, \beta_K) \in \mathbb{D}^K$  with  
 618  $\beta_j \in \mathcal{S}_i$  for all  $j \in [K]$ .

619 *Proof.* Let  $\mathbf{c} = (c_1, \dots, c_K)$  be an arbitrary optimum strategy for player  $i$ . Suppose  $\mathbf{c} \notin \mathcal{S}_i^K$ .

620 We use  $\mathbf{c}$  to construct an optimum bid vector  $\beta \in \mathcal{S}_i^K$  as follows. For each  $j \in [K]$ :

- 621 • If  $c_j \in \mathcal{S}_i$ , then set  $\beta_j = c_j$ .
- 622 • Else, set  $\beta_j = \max\{y \in \mathcal{S}_i \mid y \leq c_j\}$ .

623 Then in each round  $t$ , player  $i$  gets the same allocation when playing  $\beta$  as it does when playing  $\mathbf{c}$   
 624 and the others play  $\mathbf{b}_{-i}^t$  since the ordering of the owners of the bids is the same under  $(\mathbf{c}, \mathbf{b}_{-i}^t)$  as  
 625 it is under  $(\beta, \mathbf{b}_{-i}^t)$ ; moreover, the price weakly decreases in each round  $t$ . Thus player  $i$ 's utility  
 626 weakly improves. Since  $\mathbf{c}$  was an optimal strategy for player  $i$ , it follows that  $\beta$  is also an optimal  
 627 strategy for player  $i$  and, moreover,  $\beta \in \mathcal{S}_i^K$  as required.  $\square$

628 Next we show how to find an optimal bid vector in polynomial time. The proof uses several lemmas,  
 629 which are proved after the theorem.

630 **Theorem 1 (restated, formal).** Suppose we are given a number  $n$  of players, number  $K$  of units,  
 631 valuation  $\mathbf{v}_i$  of player  $i$ , discretization level  $\varepsilon > 0$ , and bid history  $H_{-i} = (\mathbf{b}_{-i}^1, \dots, \mathbf{b}_{-i}^T)$  by  
 632 players other than  $i$ . Then an optimum bid vector for player  $i$  can be computed in polynomial time  
 633 in the input parameters.

634 *Proof of Theorem 1.* Compute the set  $\mathcal{S}_i$  given by equation (1) and the graph  $G_i$  from Definition 1.  
 635 The proof has several steps as follows.

636  **$G_i$  is a DAG.** All the edges in  $G_i$  flow from the source  $z_-$  to the nodes from layer 1, then from the  
 637 nodes in layer  $j$  to those in layer  $j + 1$  (i.e. of the form  $(z_{r,j}, z_{s,j+1})$  for all  $j \in [K - 1]$  and  $r, s \in \mathcal{S}_i$   
 638 with  $r \geq s$ ), and finally from all the nodes in layer  $K$  to the sink  $z_+$ . A cycle would require at least  
 639 one back edge, but such edges do not exist.

640 **Bijjective map between bid vectors and paths from source to sink in  $G_i$ .** To each bid vector  
 641  $\beta = (\beta_1, \dots, \beta_K) \in \mathcal{S}_i^K$ , associate the following path in  $G_i$ :  $P(\beta) = (z_-, z_{\beta_1,1}, \dots, z_{\beta_K,K}, z_+)$ .

642 We show next the map  $P$  is a bijection from the set  $\mathcal{S}_i$  of candidate bid vectors for player  $i$  to the  
 643 set of paths from source to sink in  $G_i$ . Consider arbitrary bid vector  $\beta = (\beta_1, \dots, \beta_K) \in \mathcal{S}_i^K$ . By  
 644 definition of a bid vector, we have  $\beta_1 \geq \dots \geq \beta_K$ . Then  $P(\beta) = (z_-, z_{\beta_1,1}, \dots, z_{\beta_K,K}, z_+)$  is a  
 645 valid path in  $G_i$ .

646 Conversely, since  $G_i$  has an edge  $(z_{r,j}, z_{s,j+1})$  if and only if  $r \geq s$ , each path from source to sink in  
 647  $G_i$  has the form  $Q = (z_-, z_{\beta_1,1}, \dots, z_{\beta_K,K}, z_+)$  for some numbers  $\beta_1, \dots, \beta_K \in \mathcal{S}_i$ , and so it can  
 648 be mapped to bid vector  $\beta = (\beta_1, \dots, \beta_K)$ . Thus  $Q = P(\beta)$ , and so  $P$  is a bijective map.

649 **Utility of player  $i$  and weight of a path of length  $K$  in  $G_i$ .** Let  $\beta = (\beta_1, \dots, \beta_K) \in \mathcal{S}_i^K$ .  
 650 Additionally, let  $\beta_{K+1} = 0$ . The total utility of player  $i$  when bidding  $\beta$  in each round  $t$  while the  
 651 others bid  $\mathbf{b}_{-i}^t$  is  $U_i(\beta) = \sum_{t=1}^T u_i(\mathbf{h}^t)$ , where  $\mathbf{h}^t = (\beta, \mathbf{b}_{-i}^t) \forall t \in [T]$ .

652 Let  $P(\beta) = (z_-, z_{\beta_1,1}, \dots, z_{\beta_K,K}, z_+)$  be the path in  $G_i$  corresponding to  $\beta$ . The edges of the path  
 653  $P(\beta)$  are  $(z_-, z_{\beta_1,1})$ ,  $(z_{\beta_1,1}, z_{\beta_2,2})$ ,  $\dots$ ,  $(z_{\beta_{K-1},K-1}, z_{\beta_K,K})$ ,  $(z_{\beta_K,K}, z_+)$ , while the weight of the  
 654 path is equal to the sum of its edges. Summing equation (2), which gives the weight of an edge,  
 655 across all edges of  $P(\beta)$  implies that the weight of path  $P(\beta)$  is equal to

$$w(P(\beta)) = \sum_{j=1}^K \sum_{t=1}^T \left[ \mathbb{1}_{\{x_i(\mathbf{h}^t) \geq j\}} (v_{i,j} - \beta_j) + j \left( \mathbb{1}_{\{x_i(\mathbf{h}^t) > j\}} (\beta_j - \beta_{j+1}) + \mathbb{1}_{\{x_i(\mathbf{h}^t) = j\}} (\beta_j - p(\mathbf{h}^t)) \right) \right]. \quad (7)$$

656 We claim that  $U_i(\beta) = w(P(\beta))$ . The high level idea is to rewrite the utility to “spread it” across  
 657 the edges of the path corresponding to bid profile  $\beta$ . Towards this end, recall the utility of player  $i$   
 658 at strategy profile  $\mathbf{h}^t = (\beta, \mathbf{b}_{-i}^t)$  is

$$u_i(\mathbf{h}^t) = \sum_{j=1}^K \mathbb{1}_{\{x_i(\mathbf{h}^t) \geq j\}} (v_{i,j} - p(\mathbf{h}^t)). \quad (8)$$

659 By Lemma 1, equation (8) is equivalent to

$$u_i(\mathbf{h}^t) = \sum_{j=1}^K \left[ \mathbb{1}_{\{x_i(\mathbf{h}^t) \geq j\}} (v_{i,j} - \beta_j) + j \left( \mathbb{1}_{\{x_i(\mathbf{h}^t) > j\}} (\beta_j - \beta_{j+1}) + \mathbb{1}_{\{x_i(\mathbf{h}^t) = j\}} (\beta_j - p(\mathbf{h}^t)) \right) \right]. \quad (9)$$

660 Summing  $u_i(\mathbf{h}^t)$  over all rounds  $t$  gives

$$\begin{aligned} U_i(\beta) &= \sum_{t=1}^T u_i(\mathbf{h}^t) \\ &= \sum_{t=1}^T \sum_{j=1}^K \left[ \mathbb{1}_{\{x_i(\mathbf{h}^t) \geq j\}} (v_{i,j} - \beta_j) + j \left( \mathbb{1}_{\{x_i(\mathbf{h}^t) > j\}} (\beta_j - \beta_{j+1}) + \mathbb{1}_{\{x_i(\mathbf{h}^t) = j\}} (\beta_j - p(\mathbf{h}^t)) \right) \right] \\ &\quad \text{(By equation (9))} \\ &= \sum_{j=1}^K \sum_{t=1}^T \left[ \mathbb{1}_{\{x_i(\mathbf{h}^t) \geq j\}} (v_{i,j} - \beta_j) + j \left( \mathbb{1}_{\{x_i(\mathbf{h}^t) > j\}} (\beta_j - \beta_{j+1}) + \mathbb{1}_{\{x_i(\mathbf{h}^t) = j\}} (\beta_j - p(\mathbf{h}^t)) \right) \right] \\ &\quad \text{(Swapping the order of summation)} \\ &= w(P(\beta)). \quad \text{(By equation (7))} \end{aligned}$$

661 Thus the weight of the path  $P(\beta)$  is equal to the utility of player  $i$  from bidding  $\beta$ . The implication  
 662 is that to find an optimum bid vector, it suffices to compute a maximum weight path in  $G_i$ .

663 **Computing a maximum weight path in  $G_i$ .** The graph  $G_i$  is a DAG with a number of vertices of  
664  $G_i$  that is polynomial in the input parameters. By Lemma 2, the edge weights of  $G_i$  can be computed  
665 in polynomial time.

666 A maximum weight path in a DAG can be computed in polynomial time by changing every weight  
667 to its negation to obtain a graph  $-G$ . Since  $G$  has no cycles, the graph  $-G$  has no negative cycles.  
668 Thus running a shortest path algorithm on  $-G$  will yield a longest (i.e. maximum weight) path on  
669  $G$  in polynomial time, as required.

670 The unique bid vector corresponding to the maximum weight path found can then be recovered in  
671 time  $O(K)$  and it represents an optimum bid vector for player  $i$ .  $\square$

672 **Lemma 1.** *In the setting of Theorem 1, for each bid profile  $\beta \in \mathcal{S}_i^K$  and round  $t \in [T]$ , define*  
673  $\mathbf{h}^t = (\beta, \mathbf{b}_{-i}^t)$ . *Then we have*

$$u_i(\mathbf{h}^t) = \sum_{j=1}^K \left[ \mathbb{1}_{\{x_i(\mathbf{h}^t) \geq j\}} (v_{i,j} - \beta_j) + j \left( \mathbb{1}_{\{x_i(\mathbf{h}^t) > j\}} (\beta_j - \beta_{j+1}) + \mathbb{1}_{\{x_i(\mathbf{h}^t) = j\}} (\beta_j - p(\mathbf{h}^t)) \right) \right]. \quad (10)$$

674 *Proof.* Given bid profile  $\beta = (\beta_1, \dots, \beta_K)$ , we also define  $\beta_{K+1} = 0$ .

675 If  $x_i(\mathbf{h}^t) = 0$  then both sides of equation (10) are zero, so the statement holds. Thus it remains to  
676 prove equation (10) when  $x_i(\mathbf{h}^t) > 0$ . Let  $u_{i,j}(\mathbf{h}^t) = \mathbb{1}_{\{x_i(\mathbf{h}^t) \geq j\}} (v_{i,j} - p(\mathbf{h}^t))$  for each  $j \in [K]$ .  
677 The term  $u_{i,j}(\mathbf{h}^t)$  represents the amount of utility obtained from the  $j$ -th unit acquired by player  $i$   
678 at price  $p(\mathbf{h}^t)$ , so  $u_i(\mathbf{h}^t) = \sum_{j=1}^K u_{i,j}(\mathbf{h}^t)$ .  
679

680 We first show that for each  $j \in [K]$ :

$$u_{i,j}(\mathbf{h}^t) = \mathbb{1}_{\{x_i(\mathbf{h}^t) \geq j\}} (v_{i,j} - \beta_j) + \sum_{k=j}^K \left[ \mathbb{1}_{\{x_i(\mathbf{h}^t) > k\}} (\beta_k - \beta_{k+1}) + \mathbb{1}_{\{x_i(\mathbf{h}^t) = k\}} (\beta_k - p(\mathbf{h}^t)) \right]. \quad (11)$$

681 To prove (11), we will rewrite  $u_{i,j}(\mathbf{h}^t)$  by considering three cases and writing a unified expression  
682 for all of them.

683 1.  $x_i(\mathbf{h}^t) = j$ . Then

$$\begin{aligned} u_{i,j}(\mathbf{h}^t) &= v_{i,j} - p(\mathbf{h}^t) \\ &= (v_{i,j} - \beta_j) + (\beta_j - p(\mathbf{h}^t)) \\ &= \mathbb{1}_{\{x_i(\mathbf{h}^t) \geq j\}} (v_{i,j} - \beta_j) + \mathbb{1}_{\{x_i(\mathbf{h}^t) = j\}} (\beta_j - p(\mathbf{h}^t)) \\ &= \mathbb{1}_{\{x_i(\mathbf{h}^t) \geq j\}} (v_{i,j} - \beta_j) + \sum_{k=j}^K \left[ \mathbb{1}_{\{x_i(\mathbf{h}^t) > k\}} (\beta_k - \beta_{k+1}) + \mathbb{1}_{\{x_i(\mathbf{h}^t) = k\}} (\beta_k - p(\mathbf{h}^t)) \right]. \\ &\quad \text{(Since } \mathbb{1}_{\{x_i(\mathbf{h}^t) > k\}} = 0 \forall k \geq j \text{ and } \mathbb{1}_{\{x_i(\mathbf{h}^t) = k\}} = 1 \text{ if and only if } k = j.) \end{aligned}$$

684 2.  $x_i(\mathbf{h}^t) > j$ . Then  $x_i(\mathbf{h}^t) = j + \ell$ , for some  $\ell \in \{1, \dots, K - j\}$ . We have

$$\begin{aligned} u_{i,j}(\mathbf{h}^t) &= v_{i,j} - p(\mathbf{h}^t) \\ &= (v_{i,j} - \beta_j) + (\beta_j - \beta_{j+\ell}) + (\beta_{j+\ell} - p(\mathbf{h}^t)) \\ &= (v_{i,j} - \beta_j) + \left( \sum_{k=j}^{j+\ell-1} \beta_k - \beta_{k+1} \right) + (\beta_{j+\ell} - p(\mathbf{h}^t)). \quad (12) \end{aligned}$$

685 We are in the case where  $\mathbb{1}_{\{x_i(\mathbf{h}^t) \geq j\}} = 1$ ,  $\mathbb{1}_{\{x_i(\mathbf{h}^t) > k\}} = 1$  if and only if  $k \in \{j, \dots, j +$   
686  $\ell - 1\}$ , and  $\mathbb{1}_{\{x_i(\mathbf{h}^t) = k\}} = 1$  if and only if  $k = j + \ell$ . Adding indicators to the terms in  
687 (12) gives

$$u_{i,j}(\mathbf{h}^t) = \mathbb{1}_{\{x_i(\mathbf{h}^t) \geq j\}} (v_{i,j} - \beta_j) + \sum_{k=j}^K \left[ \mathbb{1}_{\{x_i(\mathbf{h}^t) > k\}} (\beta_k - \beta_{k+1}) + \mathbb{1}_{\{x_i(\mathbf{h}^t) = k\}} (\beta_k - p(\mathbf{h}^t)) \right].$$

688 3.  $x_i(\mathbf{h}^t) < j$ . Then  $\mathbb{1}_{\{x_i(\mathbf{h}^t) \geq j\}} = 0$ ,  $\mathbb{1}_{\{x_i(\mathbf{h}^t) > k\}} = 0$  for all  $k \in \{j, \dots, K\}$ , and  $\mathbb{1}_{\{x_i(\mathbf{h}^t) = k\}} =$   
689  $0$  for all  $k \in \{j, \dots, K\}$ . Thus we trivially have the identity required by the lemma state-  
690 ment since  $u_{i,j}(\mathbf{h}^t) = 0$  and the right hand side of (11) is zero as well.

691 Thus equation (11) holds in all three cases as required.

692 For each  $i \in [n]$  and  $j \in [K]$ , define

$$A_{i,j} = \sum_{k=j}^K \left[ \mathbb{1}_{\{x_i(\mathbf{h}^t) > k\}} (\beta_k - \beta_{k+1}) + \mathbb{1}_{\{x_i(\mathbf{h}^t) = k\}} (\beta_k - p(\mathbf{h}^t)) \right]. \quad (13)$$

693 Then equation (11) is equivalent to

$$u_{i,j}(\mathbf{h}^t) = \mathbb{1}_{\{x_i(\mathbf{h}^t) \geq j\}} (v_{i,j} - \beta_j) + A_{i,j}, \quad (14)$$

694 Summing equation (13) over all  $j \in [K]$  gives

$$\sum_{j=1}^K A_{i,j} = \sum_{j=1}^K \sum_{k=j}^K \left[ \mathbb{1}_{\{x_i(\mathbf{h}^t) > k\}} (\beta_k - \beta_{k+1}) + \mathbb{1}_{\{x_i(\mathbf{h}^t) = k\}} (\beta_k - p(\mathbf{h}^t)) \right] \quad (15)$$

$$\stackrel{a}{=} \sum_{k=1}^K \sum_{j=1}^k \left[ \mathbb{1}_{\{x_i(\mathbf{h}^t) > k\}} (\beta_k - \beta_{k+1}) + \mathbb{1}_{\{x_i(\mathbf{h}^t) = k\}} (\beta_k - p(\mathbf{h}^t)) \right] \quad (16)$$

$$= \sum_{k=1}^K (\beta_k - \beta_{k+1}) \sum_{j=1}^k \mathbb{1}_{\{x_i(\mathbf{h}^t) > k\}} + \sum_{k=1}^K (\beta_k - p(\mathbf{h}^t)) \sum_{j=1}^k \mathbb{1}_{\{x_i(\mathbf{h}^t) = k\}} \quad (17)$$

$$= \sum_{k=1}^K (\beta_k - \beta_{k+1}) \cdot k \cdot \mathbb{1}_{\{x_i(\mathbf{h}^t) > k\}} + \sum_{k=1}^K (\beta_k - p(\mathbf{h}^t)) \cdot k \cdot \mathbb{1}_{\{x_i(\mathbf{h}^t) = k\}} \quad (18)$$

695 where equation (a) holds because we change the order of the double summations and in the double  
696 summations, we consider any (integer) pair of  $(j, k)$  such that  $1 \leq k \leq j \leq K$ .

697 Then we can rewrite the utility  $u_i(\mathbf{h}^t)$  as

$$\begin{aligned} u_i(\mathbf{h}^t) &= \sum_{j=1}^K u_{i,j}(\mathbf{h}^t) \\ &= \sum_{j=1}^K \left[ \mathbb{1}_{\{x_i(\mathbf{h}^t) \geq j\}} (v_{i,j} - \beta_j) + A_{i,j} \right] \quad (\text{By equation (11)}) \\ &= \sum_{j=1}^K \mathbb{1}_{\{x_i(\mathbf{h}^t) \geq j\}} (v_{i,j} - \beta_j) + \sum_{j=1}^K (\beta_j - \beta_{j+1}) \cdot j \cdot \mathbb{1}_{\{x_i(\mathbf{h}^t) > j\}} + \sum_{k=1}^K (\beta_j - p(\mathbf{h}^t)) \cdot j \cdot \mathbb{1}_{\{x_i(\mathbf{h}^t) = j\}} \\ &\quad (\text{By equation (18)}) \\ &= \sum_{j=1}^K \left[ \mathbb{1}_{\{x_i(\mathbf{h}^t) \geq j\}} (v_{i,j} - \beta_j) + j \left( \mathbb{1}_{\{x_i(\mathbf{h}^t) > j\}} (\beta_j - \beta_{j+1}) + \mathbb{1}_{\{x_i(\mathbf{h}^t) = j\}} (\beta_j - p(\mathbf{h}^t)) \right) \right], \end{aligned}$$

698 as required by the lemma statement.  $\square$

699 **Lemma 2.** *In the setting of Theorem 1, the edge weights of the graph  $G_i$  can be computed in*  
700 *polynomial time.*

701 *Proof.* Recall the graph  $G_i$  is constructed given as parameters the number  $n$  of players, the number  
702 of units  $K$ , a player  $i$  with valuation  $\mathbf{v}_i$ , discretization level  $\varepsilon > 0$ , and a bid history  $H_{-i} =$   
703  $(\mathbf{b}_{-i}^1, \dots, \mathbf{b}_{-i}^T)$  by players other than  $i$ . Thus the goal is to show the edge weights of  $G_i$  can be  
704 computed in polynomial time in the bit length of these parameters.

705 Towards this end, we will show there exist efficiently computable values  $I_{>j}^t, I_{\geq j}^t, I_j^t \in \{0, 1\}$  and  
 706  $q^t \in \mathcal{S}_i$  such that the weight  $w_e$  of edge  $e = (z_{r,j}, z_{s,j+1})$  is equal to

$$w_e = \sum_{t=1}^T I_{\geq j}^t (v_{i,j} - r) + j \left( I_{>j}^t (r - s) + I_j^t (r - q^t) \right). \quad (19)$$

707 Roughly,  $q^t$  will correspond to the price and  $I_{>j}^t, I_{\geq j}^t, I_j^t$  will tell whether player  $i$  gets more than  $j$   
 708 units, at least  $j$  units, or exactly  $j$  units, respectively, at some profile  $\beta = (\beta_1, \dots, \beta_K) \in \mathcal{S}_i$  with  
 709  $\beta_j = r$  and  $\beta_{j+1} = s$ . The choice of  $\beta$  in will not matter, as long as  $\beta_j = r$  and  $\beta_{j+1} = s$ .

710 We prove equation (19) in several steps:

711 **Step (i).** For each  $t \in [T]$ , define  $\Gamma^t : \mathbb{R} \rightarrow \mathbb{R}$ , where

$$\Gamma^t(x) = \left| \left\{ (\ell, j) \mid (b_{\ell,j}^t > x \text{ and } \ell \in [n] \setminus \{i\}, j \in [K]) \right. \right. \\ \left. \left. \text{or } (b_{\ell,j}^t = x \text{ and } \ell \in [n], \ell < i, j \in [K]) \right\} \right|.$$

712 Thus  $\Gamma^t(x)$  counts the bids in profile  $\mathbf{b}_{-i}^t$  that would have priority to a bid of value  $x$  submitted by  
 713 player  $i$  (i.e. it counts bids strictly higher than  $x$  and submitted by players other than  $i$ , as well as  
 714 bids equal to  $x$  but submitted by players lexicographically before  $i$ ).

715 **Step (ii).** Recall the edge is denoted  $e = (z_{r,j}, z_{s,j+1})$ . Let  $\beta \in \mathcal{S}_i$  be an arbitrary bid profile with  
 716  $\beta_j = r$  and  $\beta_{j+1} = s$ . Also define  $\beta_{K+1} = 0$ .

717 If  $\Gamma^t(s) < K - j$ , then at  $\mathbf{h}^t = (\beta, \mathbf{b}_{-i}^t)$  player  $i$  receives one unit for each of the bids  $\beta_1, \dots, \beta_{j+1}$ ,  
 718 since there are at most  $K - j - 1$  bids of other players that have higher priority than player  $i$ 's highest  
 719  $j + 1$  bids. Else, player  $i$  does not get more than  $j$  units. Thus  $I_{>j}^t = \mathbb{1}_{\{x_i(\mathbf{h}^t) > j\}}$ .

720 **Step (iii).** If  $\Gamma^t(r) \leq K - j$ , then player  $i$  receives at least  $j$  units at  $(\beta, \mathbf{b}_{-i}^t)$ . The corresponding  
 721 indicator is

$$I_{\geq j}^t = \mathbb{1}_{\{\Gamma^t(s) \leq K - j\}} = \mathbb{1}_{\{x_i(\mathbf{h}^t) \geq j\}}.$$

722 **Step (iv).** If  $\Gamma^t(r) \leq K - j$  and  $\Gamma^t(s) > K - j$ , then player  $i$  receives exactly  $j$  units at  $(\beta, \mathbf{b}_{-i}^t)$ .  
 723 The indicator is

$$I_j^t = \mathbb{1}_{\{\Gamma^t(r) \leq K - j\}} \cdot \mathbb{1}_{\{\Gamma^t(s) > K - j\}} = \mathbb{1}_{\{x_i(\mathbf{h}^t) = j\}}.$$

724 Now suppose  $I_j^t = 1$ . Then we show the price  $q^t = p(\mathbf{h}^t)$  can be computed precisely without  
 725 knowing the whole bid  $\beta$ .

726 Consider the multiset of bids  $B = \mathbf{b}_{-i}^t \cup \{\beta_1, \dots, \beta_{j+1}\}$ , recalling  $\beta_{K+1}$  was defined as zero. Sort  
 727  $B$  in descending order. We know the top  $j - 1$  bids of player  $i$  are winning, so the price is not  
 728 determined by any of them. Thus the price is determined by  $\beta_j = r, \beta_{j+1} = s$ , or by one of the bids  
 729 in  $\mathbf{b}_{-i}^t$ . Remove elements  $\beta_1, \dots, \beta_{j-1}$  from  $B$  and set the price as follows:

- 730 • **Case (iv.a).** For  $(K + 1)$ -st price auction: set  $q^t$  to the  $(K + 2 - j)$ <sup>th</sup> highest value in  $B$ .
- 731 • **Case (iv.b).** For  $K$ -th price auction: set  $q^t$  to the  $(K + 1 - j)$ <sup>th</sup> highest value in  $B$ .

732 **Step (v).** Combining steps (i-iv), the weight of edge  $e = (z_{r,j}, z_{s,j+1})$  can be rewritten as

$$w_e = \sum_{t=1}^T \mathbb{1}_{\{x_i(\mathbf{h}^t) \geq j\}} (v_{i,j} - r) + j \left[ \mathbb{1}_{\{x_i(\mathbf{h}^t) > j\}} (r - s) + \mathbb{1}_{\{x_i(\mathbf{h}^t) = j\}} (r - p(\mathbf{h}^t)) \right] \\ \text{(By Definition 1)} \\ = \sum_{t=1}^T I_{\geq j}^t (v_{i,j} - r) + j \left[ I_{>j}^t (r - s) + I_j^t (r - q^t) \right]. \quad \text{(By steps (i-iv))}$$

733 Thus the weight of each edge can be computed in polynomial time as required.  $\square$

734 **C Appendix: Online Setting**

735 In this section we include the material omitted from the main text for the online setting.

736 Before studying the full information and bandit feedback models in greater detail, we replace the set  
737  $\mathcal{S}_i$  of candidate bids for player  $i$  from equation (1) of the offline section by a coarser set

$$\mathcal{S}_\varepsilon = \{\varepsilon, 2\varepsilon, \dots, \lceil v_{i,1}/\varepsilon \rceil \varepsilon\}.$$

738 The regret, which was defined in equation (3), depends on whether the model is the  $K$ -th or  $(K+1)$ -  
739 st price auction; however the next lemma holds for both variants of the auction.

740 **Lemma 3.** *For all  $\varepsilon > 0$ , let  $\text{Reg}_i(\pi_i, H_{-i}^T, \varepsilon)$  be the counterpart of (3) where  $\mathcal{S}_i$  is replaced by the  
741 set  $\mathcal{S}_\varepsilon$ . Then  $\text{Reg}_i(\pi_i, H_{-i}^T) \leq \text{Reg}_i(\pi_i, H_{-i}^T, \varepsilon) + TK\varepsilon$ .*

*Proof.* First observe that it is not beneficial to bid above  $v_{i,1}$ , so we can assume without loss of generality that the maximizer  $\beta$  in (3) satisfies  $\beta_j \leq v_{i,1}$  for all  $j \in [K]$ . Now we convert  $\beta$  into another bid vector  $\beta^\varepsilon \in \mathcal{S}_\varepsilon^K$  as follows: for each  $j \in [K]$ , let

$$\beta_j^\varepsilon = \min\{y \in \mathcal{S}_\varepsilon \mid y \geq \beta_j\}.$$

742 Clearly  $\beta_j \leq \beta_j^\varepsilon \leq \beta_j + \varepsilon$ .

743 Then we claim that the next inequalities hold:

$$p(\beta^\varepsilon, \mathbf{b}_{-i}^t) \leq p(\beta, \mathbf{b}_{-i}^t) + \varepsilon; \tag{20}$$

$$\mathbb{1}_{\{x_i(\beta^\varepsilon, \mathbf{b}_{-i}^t) \geq j\}} \geq \mathbb{1}_{\{x_i(\beta, \mathbf{b}_{-i}^t) \geq j\}}. \tag{21}$$

744 Inequality (20) follows since

- 745 •  $p(\mathbf{b})$  is either the  $K$ -th or the  $(K+1)$ -st largest element of  $\mathbf{b}$ , and
- 746 • increasing each entry of  $\mathbf{b}$  by at most  $\varepsilon$  can only increase  $p(\mathbf{b})$  by no more than  $\varepsilon$ .

747 Inequality (21) is due to the fact that bidding a higher price can only help to win the unit.

748 Consequently, we have

$$\begin{aligned} \sum_{t=1}^T \sum_{j=1}^K (v_{i,j} - p(\beta, \mathbf{b}_{-i}^t)) \cdot \mathbb{1}_{\{x_i(\beta, \mathbf{b}_{-i}^t) \geq j\}} &\leq \sum_{t=1}^T \sum_{j=1}^K (v_{i,j} - p(\beta, \mathbf{b}_{-i}^t)) \cdot \mathbb{1}_{\{x_i(\beta^\varepsilon, \mathbf{b}_{-i}^t) \geq j\}} \\ &\leq \sum_{t=1}^T \sum_{j=1}^K (v_{i,j} - p(\beta^\varepsilon, \mathbf{b}_{-i}^t) - \varepsilon) \cdot \mathbb{1}_{\{x_i(\beta^\varepsilon, \mathbf{b}_{-i}^t) \geq j\}} \\ &\leq \sum_{t=1}^T \sum_{j=1}^K (v_{i,j} - p(\beta^\varepsilon, \mathbf{b}_{-i}^t)) \cdot \mathbb{1}_{\{x_i(\beta^\varepsilon, \mathbf{b}_{-i}^t) \geq j\}} + TK\varepsilon. \end{aligned}$$

749 This gives the desired statement of the lemma. □

750 **C.1 Full Information Feedback**

751 In this section we include the omitted details for the full information setting.

752 We begin with the formal definition of the graph  $G^t = (V, E, w^t)$  used by the online learning  
753 algorithm with full information feedback.

754 **Definition 2** (The graph  $G^t$ ). *Given valuation  $\mathbf{v}_i$  of player  $i$ , bid profile  $\mathbf{b}_{-i}^t$  of the players at round  
755  $t$ , and  $\varepsilon > 0$ , construct a graph  $G^t = (V, E, w^t)$  as follows.*

- 756 • **Vertices.** Create a vertex  $z_{s,j}$  for each  $s \in \mathcal{S}_\varepsilon$  and index  $j \in [K]$ . We say vertex  $z_{s,j}$  is in  
757 layer  $j$ . Add source  $z_-$  and sink  $z_+$ .
- 758 • **Edges.** For each index  $j \in [K-1]$  and pair of bids  $r, s \in \mathcal{S}_\varepsilon$  with  $r \geq s$ , create a directed  
759 edge from vertex  $z_{r,j}$  to vertex  $z_{s,j+1}$ . Moreover, add edges from source  $z_-$  to each node  
760 in layer 1 and from each node in layer  $K$  to the sink  $z_+$ .

761 • **Edge weights.** For each edge  $e = (z_{r,j}, z_{s,j+1})$  or  $e = (z_{r,K}, z_+)$ , let  $\beta = (\beta_1, \dots, \beta_K) \in$   
762  $\mathcal{S}_\varepsilon^K$  be a bid vector with  $\beta_j = r$  and  $\beta_{j+1} = s$  (we define  $s = 0$  if  $j = K$ ). For each  $t$ , let  
763  $\mathbf{h}^t = (\beta, \mathbf{b}_{-i}^t)$ . Define the weight of edge  $e$  as

$$w^t(e) = \mathbb{1}_{\{x_i(\mathbf{h}^t) \geq j\}} (v_{i,j} - r) + j \left[ \mathbb{1}_{\{x_i(\mathbf{h}^t) > j\}} (r - s) + \mathbb{1}_{\{x_i(\mathbf{h}^t) = j\}} (r - p(\mathbf{h}^t)) \right].$$

764 The edges incoming from  $z_-$  have weight zero.

765 The next observation follows immediately from the definition.

766 **Observation 2.** The next properties hold:

- 767 • The weight  $w^t(e)$  of each edge  $e$  of  $G^t$  can be computed efficiently (see Lemma 2).
- 768 • There is a bijective map between bid vectors  $\beta \in \mathcal{S}_\varepsilon^K$  of player  $i$  and paths from the source  
769 to the sink of  $G^t$  (see proof of Theorem 1).

770 Next we include the main theorem with its proof for the online learning algorithm under full infor-  
771 mation feedback.

772 **Theorem 2 (restated).** For each player  $i$  and time horizon  $T$ , under full-information feedback,  
773 Algorithm 2 runs in time  $O(T^2)$  and guarantees the player's regret is at most  $O\left(v_{i,1} \sqrt{TK^3 \log T}\right)$ .

774 *Proof.* The detailed algorithm description is presented as Algorithm 2. At a high level, the proof  
775 has three parts: (i) showing that Algorithm 2 is a correct implementation of the Hedge algorithm  
776 where each expert is a path from source to sink in the DAG  $G^t$  for time  $t$ , (ii) bounding its regret  
777 for an appropriate choice of the learning rate, and (iii) bounding the runtime.

778 **Step I: Algorithm 2 is a correct implementation of Hedge.** We show that Algorithm 2 is the  
779 same as the Hedge algorithm in which every path in the DAG is equivalent to an expert in the Hedge  
780 algorithm.

781 To do so, for each vertex  $u$  in the DAG, let  $\phi^t(u, \cdot)$  be a probability distribution over the outneighbors  
782 of  $u$ . Then, given the recursive sampling of the bids based on the probability distribution  $\phi^t$ 's, the  
783 probability that a path  $\mathbf{p}$  is chosen in Algorithm 2 is equal to

$$P^t(\mathbf{p}) = \prod_{e \in \mathbf{p}} \phi^t(e), \quad (22)$$

784 where  $\phi^t$ 's are updated in equation (5), which is restated below:

$$\phi^t(e) = \phi^{t-1}(e) \cdot \exp(\eta \cdot w^{t-1}(e)) \cdot \frac{\Gamma^{t-1}(v)}{\Gamma^{t-1}(u)}, \quad \text{for all } e = (u, v) \in E(G^t). \quad (5 \text{ revisited.})$$

785 On the other hand, in the Hedge algorithm, the path probabilities are updated as follows: Given a  
786 learning rate  $\eta$ , define  $P_h^1(\mathbf{p}) = \prod_{e \in \mathbf{p}} \phi^1(e)$ , and for  $t \geq 2$ ,

$$P_h^t(\mathbf{p}) = \frac{P_h^{t-1}(\mathbf{p}) \exp(\eta \sum_{e \in \mathbf{p}} w^{t-1}(e))}{\sum_{\mathbf{q}} P_h^{t-1}(\mathbf{q}) \exp(\eta \sum_{e \in \mathbf{q}} w^{t-1}(e))}. \quad (23)$$

787 The subscript 'h' in  $P_h^t(\mathbf{p})$  stands for Hedge. To show that the update rule in Algorithm 2 is equiva-  
788 lent to the one in Hedge, we first prove the following statement:

789 (†) For any vertex  $u$  in the graph, let  $\mathcal{P}(u)$  be the set of all paths from  $u$  to  $z_+$ .  
790 Then

$$\Gamma^{t-1}(u) = \sum_{\mathbf{q} \in \mathcal{P}(u)} \prod_{e \in \mathbf{q}} [\phi^{t-1}(e) \exp(\eta w^{t-1}(e))]. \quad (24)$$

791 We prove equation (24) by induction on  $u$ , from the bottom layer to the top layer. If  $u = z_+$ , by  
 792 definition  $\Gamma^{t-1}(z_+) = 1$ , and (24) holds. Now suppose that (24) holds for all  $u$  in the  $(k+1)$ -st  
 793 layer, for some  $0 \leq k \leq K$ . Then if  $u$  is in the  $k$ -th layer, the recursion of  $\Gamma^{t-1}$  gives that

$$\begin{aligned} \Gamma^{t-1}(u) &= \sum_{v:(u,v) \in E} \phi^{t-1}((u,v)) \exp(\eta w^{t-1}((u,v))) \cdot \Gamma^{t-1}(v) \\ &= \sum_{v:(u,v) \in E} \phi^{t-1}((u,v)) \exp(\eta w^{t-1}((u,v))) \cdot \sum_{\mathfrak{q} \in \mathcal{P}(v)} \prod_{e \in \mathfrak{q}} [\phi^{t-1}(e) \exp(\eta w^{t-1}(e))] \\ &= \sum_{\mathfrak{q} \in \mathcal{P}(u)} \prod_{e \in \mathfrak{q}} [\phi^{t-1}(e) \exp(\eta w^{t-1}(e))], \end{aligned}$$

794 and therefore (24) holds.

795 Having shown equation (24), we prove by induction on  $t$  our claim that Algorithm 2 is a correct  
 796 implementation of Hedge, i.e. that  $P^t(\mathfrak{p}) = P_h^t(\mathfrak{p})$  for all paths  $\mathfrak{p}$  and rounds  $t$ . For  $t = 1$ , by  
 797 definition of our initialization we have  $P_h^1(\mathfrak{p}) = P^1(\mathfrak{p})$ . Suppose that at time  $t-1$ , for every path  $\mathfrak{p}$   
 798 we have  $P_h^{t-1}(\mathfrak{p}) = P^{t-1}(\mathfrak{p}) = \prod_{e \in \mathfrak{p}} \phi^{t-1}(e)$ . Then at time  $t$ , it holds that

$$\begin{aligned} P^t(\mathfrak{p}) &= \prod_{e \in \mathfrak{p}} \phi^t(e) \stackrel{(a)}{=} \prod_{e=(u,v) \in \mathfrak{p}} \left[ \phi^{t-1}(e) \cdot \exp(\eta \cdot w^{t-1}(e)) \cdot \frac{\Gamma^{t-1}(v)}{\Gamma^{t-1}(u)} \right] \\ &\stackrel{(b)}{=} P_h^{t-1}(\mathfrak{p}) \exp\left(\eta \sum_{e \in \mathfrak{p}} w^{t-1}(e)\right) \cdot \frac{\Gamma^{t-1}(z_+)}{\Gamma^{t-1}(z_-)}, \end{aligned}$$

799 where step (a) is due to equation (5), and step (b) follows using telescoping and the induction hy-  
 800 pothesis  $P_h^{t-1}(\mathfrak{p}) = \prod_{e \in \mathfrak{p}} \phi^{t-1}(e)$ .

801 Given equation (23), by applying equation (24) to  $u \in \{z_-, z_+\}$  and the induction hypothesis  
 802  $P_h^{t-1}(\mathfrak{p}) = \prod_{e \in \mathfrak{p}} \phi^{t-1}(e)$ , the induction is complete.

803 Thus Algorithm 2 is a correct implementation of Hedge.

804 **Step II: Regret upper bound.** Let

$$\varepsilon = v_{i,1} \sqrt{K/T}. \quad (25)$$

805 Applying Lemma 3 yields

$$\text{Reg}_i(\pi_i, H_{-i}^T) \leq \text{Reg}_i(\pi_i, H_{-i}^T, \varepsilon) + TK\varepsilon = \text{Reg}_i(\pi_i, H_{-i}^T, \varepsilon) + v_{i,1} \sqrt{TK^3}, \quad (26)$$

806 where  $\text{Reg}_i(\pi_i, H_{-i}^T, \varepsilon)$  is the counterpart of (3) where  $\mathcal{S}_i$  is replaced by the set

$$\mathcal{S}_\varepsilon = \{\varepsilon, 2\varepsilon, \dots, \lceil v_{i,1}/\varepsilon \rceil \varepsilon\}.$$

807 We also claim that  $\sum_{e \in \mathfrak{p}} w^t(e) \leq K v_{i,1}$  for each path  $\mathfrak{p}$  from source to sink in  $G^t$ . To see this, let  
 808  $\beta$  be the bid vector corresponding to path  $\mathfrak{p}$ . As shown in Lemma 1 and using the fact that edges  
 809 outgoing from  $z_-$  have weight zero, we have  $u_i(\beta, \mathbf{b}_{-i}^t) = \sum_{e \in \mathfrak{p}} w^t(e)$ . Since player  $i$ 's utility  
 810 satisfies  $u_i(\beta, \mathbf{b}_{-i}^t) \leq V_i(x_i(\beta, \mathbf{b}_{-i}^t)) \leq K v_{i,1}$ , we obtain  $\sum_{e \in \mathfrak{p}} w^t(e) \leq K v_{i,1}$ .

811 By Step I, Algorithm 2 is a correct implementation of Hedge. To bound the regret of the algorithm,  
 812 we will invoke Corollary 1—which is a slight variant of [CBL06, Theorem 2.2]—with the following  
 813 parameters:

- 814 •  $N$  experts, where each expert is a path from source to sink in  $G^t$ ;
- 815 • learning rate  $\eta$ , time horizon  $T$ , and maximum reward  $L = K v_{i,1}$ ;
- 816 • initial distribution  $\sigma$  on the experts, where  $\sigma_{\mathfrak{p}} = P^1(\mathfrak{p})$  for each expert (path from source  
 817 to sink)  $\mathfrak{p}$ .



818 By Corollary 1, we obtain

$$\text{Reg}_i(\pi_i, H_{-i}^T, \varepsilon) \leq \frac{1}{\eta} \max_{\mathbf{p} \in [N]} \log \left( \frac{1}{\sigma_{\mathbf{p}}} \right) + \frac{TL^2\eta}{8}. \quad (27)$$

819 Recall Algorithm 2 initially selects a path by starting at the source  $z_-$  and then performing an  
 820 unbiased random walk in the layered DAG until reaching the sink  $z_+$ . Since the number of vertices  
 821 in each layer is  $\lceil v_{i,1}/\varepsilon \rceil$ , the initial probability of selecting a particular expert (i.e. path from source  
 822 to sink)  $\mathbf{p}$  is

$$\sigma_{\mathbf{p}} = P^1(\mathbf{p}) \geq \frac{1}{\lceil v_{i,1}/\varepsilon \rceil^K}, \quad \forall \mathbf{p} \in [N]. \quad (28)$$

823 Substituting (28) in (27) yields

$$\begin{aligned} \text{Reg}_i(\pi_i, H_{-i}^T, \varepsilon) &\leq \frac{1}{\eta} \max_{\mathbf{p} \in [N]} \log \left( \frac{1}{\sigma_{\mathbf{p}}} \right) + \frac{TL^2\eta}{8} \leq \frac{K \log(\lceil v_{i,1}/\varepsilon \rceil)}{\eta} + \frac{TL^2\eta}{8} \\ &= \frac{K \log \left( \left\lceil \sqrt{\frac{T}{K}} \right\rceil \right)}{\eta} + \frac{T(Kv_{i,1})^2 \eta}{8} \quad (\text{Since } \varepsilon = v_{i,1} \sqrt{\frac{K}{T}} \text{ and } L = Kv_{i,1}.) \\ &\leq \frac{K \log T}{\eta} + \frac{T(Kv_{i,1})^2 \eta}{8}. \end{aligned} \quad (29)$$

824 For  $\eta = \sqrt{\log T}/(v_{i,1}\sqrt{KT})$ , inequality (29) gives

$$\begin{aligned} \text{Reg}_i(\pi_i, H_{-i}^T, \varepsilon) &\leq \frac{K \cdot \log T}{\sqrt{\log T}/(v_{i,1}\sqrt{KT})} + \frac{T\sqrt{\log T}}{8(v_{i,1}\sqrt{KT})} \cdot (Kv_{i,1})^2 \\ &= \frac{9v_{i,1}}{8} \sqrt{TK^3 \log T}. \end{aligned} \quad (30)$$

825 Combining inequalities (26) and (30), we get that the regret of player  $i$  when running Algorithm 2 is

$$\begin{aligned} \text{Reg}_i(\pi_i, H_{-i}^T) &\leq \text{Reg}_i(\pi_i, H_{-i}^T, \varepsilon) + v_{i,1}\sqrt{TK^3} \\ &\leq \frac{9v_{i,1}}{8} \sqrt{TK^3 \log T} + v_{i,1}\sqrt{TK^3} \in O\left(v_{i,1}\sqrt{TK^3 \log T}\right). \end{aligned} \quad (31)$$

826 This completes the proof of the regret upper bound.

827 **Polynomial time implementation.** Finally we analyze the running time of the above algorithm.  
 828 At every step, the computation of path kernels traverses all edges (note that each edge only appears  
 829 in the sum once) and could be done in  $O(|E|) = O(Kv_{i,1}^2/\varepsilon^2)$  time. Similarly, the update of edge  
 830 probabilities  $\phi^t$  for all edges also takes  $O(|E|) = O(Kv_{i,1}^2/\varepsilon^2)$  time.

831 Therefore, the overall computational complexity is  $O(TKv_{i,1}^2/\varepsilon^2) = O(T^2)$ , where we used the  
 832 choice of  $\varepsilon = v_{i,1}\sqrt{K/T}$ . This completes the proof of the theorem.  $\square$

## 833 C.2 Bandit Feedback

834 In this section we include the main theorem and proof for the bandit setting. Recall that our algorithm  
 835 for the bandit setting is the same as Algorithm 2, only with  $w^t(e)$  replaced by  $\hat{w}^t(e)$ :

$$\hat{w}^t(e) = \bar{w}(e) - \frac{\bar{w}(e) - w^t(e)}{p^t(e)} \mathbb{1}_{\{e \in \mathbf{p}^t\}}, \quad \text{with } p^t(e) = \sum_{\mathbf{p}: e \in \mathbf{p}} P^t(\mathbf{p}),$$

836 with  $P^t$  given in (22), and

$$\bar{w}(e) = \begin{cases} v_{i,1} - r + j(r - s) & \text{if } e = (z_{r,j}, z_{s,j+1}), \\ v_{i,1} - r + Kr & \text{if } e = (z_{r,K}, z_+), \\ 0 & \text{if } e = (z_-, z_{r,1}). \end{cases}$$

837 The resolution parameter and learning rate are chosen to be

$$\varepsilon = v_{i,1} \min\{(K^3 \log T/T)^{1/4}, 1\}, \quad \eta = \min\left\{\varepsilon \sqrt{\log(v_{i,1}/\varepsilon)/(TK^3 v_{i,1}^4)}, 1/(Kv_{i,1})\right\}. \quad (32)$$

838 **Theorem 3 (restated).** For each player  $i$  and time horizon  $T$ , under the bandit feedback, there is an  
 839 algorithm for bidding that runs in time  $O(TK + K^{-5/4}T^{7/4})$  and guarantees the player's regret is  
 840 at most  $O(\min\{v_{i,1}(T^3 K^7 \log T)^{1/4}, v_{i,1}KT\})$ .

*Proof.* By Lemma 3 and the choice of  $\varepsilon$  in (32), it suffices to show that the above algorithm  $\pi_i$  runs in time  $O(TKv_{i,1}^3/\varepsilon^3)$  and achieves

$$\text{Reg}_i(\pi_i, H_{-i}^T, \varepsilon) = O\left(v_{i,1}^2 \sqrt{TK^5 \log(v_{i,1}/\varepsilon)}/\varepsilon + v_{i,1}K^2 \log(v_{i,1}/\varepsilon)\right).$$

841 The claimed result then follows from the fact that the regret is always upper bounded by  $O(v_{i,1}KT)$ .

842 Before we proceed to the proof, we first comment on the choice of estimator  $\hat{w}^t(e)$ . First of all, this is  
 843 an unbiased estimator of  $w^t(e)$ , i.e.  $\mathbb{E}_{\mathbf{p}^t \sim P^t}[\hat{w}^t(e)] = w^t(e)$  for every edge  $e$  in  $G^t$ . Second, instead  
 844 of using the natural importance-weighted estimator  $\hat{w}^t(e) = w^t(e) \mathbb{1}_{\{e \in \mathbf{p}^t\}}/p^t(e)$ , the current form  
 845 in (6) is the loss-based importance-weighted estimator used for technical reasons, similar to [LS20,  
 846 Eqn. (11.6)]. Third, by exploiting our DAG structure and the definition of  $w^t(e)$  in (4), we construct  
 847 an edge-specific quantity  $\bar{w}(e)$  which always upper bounds  $w^t(e)$ .

848 We now analyze the regret of the algorithm with  $\hat{w}^t(e)$  given by (6). The standard EXP3 analysis  
 849 (see, e.g. [LS20, Chapter 11]) gives that

$$\text{Reg}_i(\pi_i, H_{-i}^T, \varepsilon) \leq \frac{1}{\eta} \max_{\mathbf{p}} \log \frac{1}{P^1(\mathbf{p})} + \sum_{t=1}^T \mathbb{E} \left[ \frac{1}{\eta} \log \left( \sum_{\mathbf{p}} P^t(\mathbf{p}) e^{\eta \hat{w}^t(\mathbf{p})} \right) - \sum_{\mathbf{p}} P^t(\mathbf{p}) \hat{w}^t(\mathbf{p}) \right], \quad (33)$$

850 where  $\hat{w}^t(\mathbf{p}) = \sum_{e \in \mathbf{p}} \hat{w}^t(e)$  is the estimated total weight of path  $\mathbf{p}$ , and the expectation is with  
 851 respect to the randomness in the estimator  $\hat{w}^t(e)$ . For every path  $\mathbf{p} = (z_-, z_{r_1,1}, \dots, z_{r_K,K}, z_+)$   
 852 from the source to the sink, we have (by convention  $r_{K+1} = 0$ ):

$$\hat{w}^t(\mathbf{p}) = \sum_{e \in \mathbf{p}} w^t(e) \leq \sum_{e \in \mathbf{p}} \bar{w}(e) = \sum_{j=1}^K (v_{i,1} - (j-1)r_j + jr_{j+1}) = Kv_{i,1}.$$

853 Since  $e^x \leq 1 + x + x^2$  whenever  $x \leq 1$  and  $\log(1+y) \leq y$  whenever  $y > -1$ , if  $\eta \leq 1/(Kv_{i,1})$ ,  
 854 inequality (33) gives

$$\begin{aligned} \text{Reg}_i(\pi_i, H_{-i}^T, \varepsilon) &\leq \frac{1}{\eta} \max_{\mathbf{p}} \log \frac{1}{P^1(\mathbf{p})} + \eta \sum_{t=1}^T \sum_{\mathbf{p}} P^t(\mathbf{p}) \mathbb{E}[\hat{w}^t(\mathbf{p})^2] \\ &\leq \frac{K}{\eta} \log \left\lceil \frac{v_{i,1}}{\varepsilon} \right\rceil + \eta \sum_{t=1}^T \sum_{\mathbf{p}} P^t(\mathbf{p}) \cdot (K+1) \sum_{e \in \mathbf{p}} \mathbb{E}[\hat{w}^t(e)^2], \end{aligned}$$

855 where the last equality uses  $(\sum_{i=1}^n x_i)^2 \leq n \sum_{i=1}^n x_i^2$ , and that each path  $\mathbf{p}$  from the source to the  
 856 sink has length  $K+1$ . To proceed, note that

$$\begin{aligned} \mathbb{E}[\hat{w}^t(e)^2] &= \bar{w}(e)^2 \cdot (1 - p^t(e)) + \left( \bar{w}(e) - \frac{\bar{w}(e) - w^t(e)}{p^t(e)} \right)^2 \cdot p^t(e) \\ &= w^t(e)^2 + (\bar{w}(e) - w^t(e))^2 \cdot \left( \frac{1}{p^t(e)} - 1 \right), \end{aligned}$$

857 and therefore

$$\begin{aligned} \sum_{\mathbf{p}} P^t(\mathbf{p}) \sum_{e \in \mathbf{p}} \mathbb{E}[\hat{w}^t(e)^2] &= \sum_{\mathbf{p}} P^t(\mathbf{p}) \sum_{e \in \mathbf{p}} \left[ w^t(e)^2 + (\bar{w}(e) - w^t(e))^2 \cdot \left( \frac{1}{p^t(e)} - 1 \right) \right] \\ &= \sum_e \left[ w^t(e)^2 + (\bar{w}(e) - w^t(e))^2 \cdot \left( \frac{1}{p^t(e)} - 1 \right) \right] \sum_{\mathbf{p}: e \in \mathbf{p}} P^t(\mathbf{p}) \\ &= \sum_e \left[ w^t(e)^2 p^t(e) + (\bar{w}(e) - w^t(e))^2 (1 - p^t(e)) \right] \leq \sum_e \bar{w}(e)^2, \end{aligned}$$

858 where in the middle we have used the definition  $\sum_{\mathbf{p}:e \in \mathbf{p}} P^t(\mathbf{p}) = p^t(e)$  in (6). To further upper  
859 bound the above quantity, note that

$$\begin{aligned} \sum_e \bar{w}(e)^2 &\leq \sum_{j=1}^K \sum_{1 \leq s \leq r \leq \lceil v_{i,1}/\varepsilon \rceil} (v_{i,1} + (j-1)r\varepsilon)^2 \\ &\leq \left\lceil \frac{v_{i,1}}{\varepsilon} \right\rceil \sum_{j=1}^K \sum_{r=1}^{\lceil v_{i,1}/\varepsilon \rceil} (V + (j-1)r\varepsilon)^2 \\ &\leq 2 \left\lceil \frac{v_{i,1}}{\varepsilon} \right\rceil \sum_{j=1}^K \sum_{r=1}^{\lceil v_{i,1}/\varepsilon \rceil} (v_{i,1}^2 + (j-1)^2 r^2 \varepsilon^2) = O\left(\frac{K^3 v_{i,1}^4}{\varepsilon^2}\right). \end{aligned}$$

860 A combination of the above inequalities shows that as long as  $\eta \leq 1/(Kv_{i,1})$ ,

$$\text{Reg}_i(\pi_i, H_{-i}^T, \varepsilon) = O\left(\frac{K}{\eta} \log \frac{v_{i,1}}{\varepsilon} + \frac{\eta T K^4 v_{i,1}^4}{\varepsilon^2}\right).$$

861 Next, by the choice of  $\eta$  in (32), we have

$$\text{Reg}_i(\pi_i, H_{-i}^T, \varepsilon) = O\left(\frac{v_{i,1}^2 \sqrt{TK^5 \log(v_{i,1}/\varepsilon)}}{\varepsilon} + K^2 v_{i,1} \log \frac{v_{i,1}}{\varepsilon}\right).$$

862 As for the computational complexity, the only difference from the Algorithm 2 is the additional  
863 computation of the estimated weights  $\hat{w}^t(e)$  in (6), or equivalently, the marginal probability  $p^t(e)$ .  
864 As  $P^t$  has a product structure in (22), the celebrated message passing algorithm in graphical mod-  
865 els [WJ08, Section 2.5.1] takes  $O(|E|v_{i,1}/\varepsilon) = O(Kv_{i,1}^3/\varepsilon^3)$  time to compute all edge marginals  
866  $\{p^t(e)\}_{e \in E}$ . Therefore the overall computational complexity is  $O(TKv_{i,1}^3/\varepsilon^3)$ .  $\square$

### 867 C.3 Regret Lower Bound

868 In this section we include the theorem and proof for the regret lower bound. The construction uses  
869 the  $(K+1)$ -st highest price, but is similar for the  $K$ -th highest price.

870 **Theorem 4 (restated, formal).** *Let  $K \geq 2$ . For any policy  $\pi_i$  used by player  $i$ , there ex-*  
871 *ists a bid sequence  $\{\mathbf{b}_{-i}^t\}_{t=1}^T$  for the other players such that the expected regret in (3) satisfies*  
872  $\mathbb{E}[\text{Reg}_i(\pi_i, \{\mathbf{b}_{-i}^t\}_{t=1}^T)] \geq cv_{i,1}K\sqrt{T}$ , *where  $c > 0$  is an absolute constant.*

873 *Proof.* Without loss of generality assume that  $K = 2k$  is an even integer, and by scaling we may  
874 assume that  $v_{i,1} = 1$ . Consider the following two scenarios:

- 875 • the utility of the bidder  $i$  is  $v_{i,j} \equiv 1$ , for all  $j \in [K]$ ;
- 876 • at scenario 1, for every  $t \in [T]$ , the other bidders' bids are

$$\mathbf{b}_{-i}^t = \begin{cases} \left(\frac{2}{3}, \frac{2}{3}, \dots, \frac{2}{3}, 0, \dots, 0\right) & \text{with probability } 0.5 + \delta, \\ \left(\frac{2}{3}, \frac{2}{3}, \dots, \frac{2}{3}, \frac{2}{3}, \dots, \frac{2}{3}\right) & \text{with probability } 0.5 - \delta, \end{cases}$$

877 where the number of non-zero entries is  $k$  in the first line and  $2k$  in the second line, and  
878  $\delta \in (0, 1/4)$  is a parameter to be determined later. The randomness used at different times  
879 is independent.

- 880 • at scenario 2, for every  $t \in [T]$ , the other bidders' bids are

$$\mathbf{b}_{-i}^t = \begin{cases} \left(\frac{2}{3}, \frac{2}{3}, \dots, \frac{2}{3}, 0, \dots, 0\right) & \text{with probability } 0.5 - \delta, \\ \left(\frac{2}{3}, \frac{2}{3}, \dots, \frac{2}{3}, \frac{2}{3}, \dots, \frac{2}{3}\right) & \text{with probability } 0.5 + \delta, \end{cases}$$

881 where the number of non-zero entries is  $k$  in the first line and  $2k$  in the second line, and  
882  $\delta \in (0, 1/4)$  is a parameter to be determined later. The randomness used at different times  
883 is independent.

884 We denote by  $P$  and  $Q$  the distributions of  $\{\mathbf{b}_{-i}^t\}_{t=1}^T$  under scenarios 1 and 2, respectively, then

$$\begin{aligned} D_{\text{KL}}(P\|Q) &= T \cdot D_{\text{KL}}(\text{Bern}(0.5 + \delta)\|\text{Bern}(0.5 - \delta)) \\ &\leq T \cdot \chi^2(\text{Bern}(0.5 + \delta)\|\text{Bern}(0.5 - \delta)) \\ &= T \cdot \frac{(2\delta)^2}{(0.5 + \delta)(0.5 - \delta)} \leq \frac{64}{3}T\delta^2. \end{aligned}$$

885 Consequently, by [Tsy09, Lemma 2.6],

$$1 - \text{TV}(P, Q) \geq \frac{1}{2} \exp(-D_{\text{KL}}(P\|Q)) \geq \frac{1}{2} \exp\left(-\frac{64T\delta^2}{3}\right).$$

886 Next we investigate the separation between these two scenarios. It is clear that

$$\begin{aligned} \max_{\mathbf{b}_i} \mathbb{E}_P [u_i(\mathbf{b}_i; \mathbf{b}_{-i}^t)] &\geq \mathbb{E}_P [u_i((1, 1, \dots, 1, 0, \dots, 0); \mathbf{b}_{-i}^t)] \\ &= \left(\frac{1}{2} + \delta\right) \cdot k + \left(\frac{1}{2} - \delta\right) \cdot \frac{k}{3} = \frac{2 + 2\delta}{3} \cdot k; \\ \max_{\mathbf{b}_i} \mathbb{E}_Q [u_i(\mathbf{b}_i; \mathbf{b}_{-i}^t)] &\geq \mathbb{E}_Q [u_i((1, 1, \dots, 1, 1, \dots, 1); \mathbf{b}_{-i}^t)] \\ &= \left(\frac{1}{2} - \delta\right) \cdot \frac{2k}{3} + \left(\frac{1}{2} + \delta\right) \cdot \frac{2k}{3} = \frac{2k}{3}. \end{aligned}$$

887 Moreover, under  $(P + Q)/2$  (i.e.  $\mathbf{b}_{-i}^t$  follows a  $\text{Bern}(1/2)$  distribution), suppose that the vector  $\mathbf{b}_i$   
888 has  $k'$  components smaller than  $2/3$ . Distinguish into two scenarios:

889 • if  $k' < k$ , then

$$\mathbb{E}_{(P+Q)/2} [u_i(\mathbf{b}_i; \mathbf{b}_{-i}^t)] \leq \frac{1}{2} \cdot \frac{2k - k'}{3} + \frac{1}{2} \cdot \frac{2k - k'}{3} \leq \frac{2k}{3};$$

890 • if  $k' \geq k$ , then

$$\mathbb{E}_{(P+Q)/2} [u_i(\mathbf{b}_i; \mathbf{b}_{-i}^t)] \leq \frac{1}{2} \cdot (2k - k') + \frac{1}{2} \cdot \frac{2k - k'}{3} \leq \frac{2k}{3}.$$

891 Therefore, it always holds that

$$\max_{\mathbf{b}_i} \mathbb{E}_{(P+Q)/2} [u_i(\mathbf{b}_i; \mathbf{b}_{-i}^t)] \leq \frac{2k}{3}.$$

892 Consequently, for each  $\mathbf{b}_i$ ,

$$\begin{aligned} &\max_{\mathbf{b}_i^*} \mathbb{E}_P [u_i(\mathbf{b}_i^*; \mathbf{b}_{-i}^t) - u_i(\mathbf{b}_i; \mathbf{b}_{-i}^t)] + \max_{\mathbf{b}_i^*} \mathbb{E}_Q [u_i(\mathbf{b}_i^*; \mathbf{b}_{-i}^t) - u_i(\mathbf{b}_i; \mathbf{b}_{-i}^t)] \\ &\geq \max_{\mathbf{b}_i^*} \mathbb{E}_P [u_i(\mathbf{b}_i^*; \mathbf{b}_{-i}^t)] + \max_{\mathbf{b}_i^*} \mathbb{E}_Q [u_i(\mathbf{b}_i^*; \mathbf{b}_{-i}^t)] - 2 \max_{\mathbf{b}_i} \mathbb{E}_{(P+Q)/2} [u_i(\mathbf{b}_i; \mathbf{b}_{-i}^t)] \\ &\geq \frac{2 + 2\delta}{3}k + \frac{2k}{3} - 2 \cdot \frac{2k}{3} = \frac{2\delta k}{3}. \end{aligned}$$

893 In other words, any bid vector  $\mathbf{b}_i$  either incurs a total regret  $(\delta k T)/3$  under  $P$ , or incurs a total regret  
894  $(\delta k T)/3$  under  $Q$ .

895 Now the classical two-point method (see, e.g. [Tsy09, Theorem 2.2]) gives

$$\mathbb{E}_{(P+Q)/2} [\text{Reg}_i(\pi_i, \{\mathbf{b}_{-i}^t\}_{t=1}^T)] \geq \frac{\delta k T}{3} \cdot (1 - \text{TV}(P, Q)) \geq \frac{\delta k T}{6} \exp\left(-\frac{64T\delta^2}{3}\right)$$

896 for every  $\delta \in (0, 1/4)$ . Choosing  $\delta = 1/(8\sqrt{T})$  gives that

$$\mathbb{E}_{(P+Q)/2} [\text{Reg}_i(\pi_i, \{\mathbf{b}_{-i}^t\}_{t=1}^T)] \geq \frac{K\sqrt{T}}{96e^{1/3}},$$

897 i.e. the claimed lower bound holds with  $c = 1/(96e^{1/3})$ . □

## 898 D Appendix: Equilibrium Analysis

899 In this section we show that the pure Nash equilibria with price zero of the  $(K + 1)$ -st auction are  
 900 the only ones that are robust to deviations by groups of players, captured through the notion of the  
 901 core in the game among the bidders. The core of a game was formulated by Edgeworth [Edg81] and  
 902 brought into game theory by Gillies [Gil59]. There is an extensive body of literature on the core of  
 903 various games, including for auctions; see, e.g., analysis of collusion (cartel behavior) in first price  
 904 auctions in [Pes00].

905 Our focus here is the core of the game among the bidders, where the auctioneer first sets the auction  
 906 format and then the bidders can strategize and collude among themselves, without the auctioneer.  
 907 Roughly speaking, a strategy profile is core-stable if no group  $C$  of players can deviate simultane-  
 908 ously (i.e. each player  $i \in C$  deviates to some alternative strategy profile), such that each player in  $C$   
 909 weakly improves and the improvement is strict for at least one player. For a deviation to take place,  
 910 the players in  $C$  coordinate and switch their strategies simultaneously, while the players outside  $C$   
 911 keep their previous strategies. Every core-stable strategy profile is also a Nash equilibrium, since a  
 912 strategy profile that is stable against deviations by groups of players is also stable against deviations  
 913 by individuals.

914 We consider two variants of the core, with and without monetary transfers [SS69, Bon63, Sha67].  
 915 In the case with transfers, the players can make monetary payments to each other, and so a strategy  
 916 profile consists of a tuple of bids and transfers. In the case without transfers, the players cannot  
 917 make such transfers and their strategy is the bid vector; thus the only agreement they can make in  
 918 this case is to coordinate their bids.

### 919 D.1 Core with transfers

920 A strategy profile in this setting is described by a tuple  $(\mathbf{b}, \mathbf{t})$ , where  $\mathbf{b}$  is a bid profile and  $\mathbf{t}$  is a  
 921 profile of payments (aka monetary transfers), such that  $t_{i,j} \geq 0$  is the monetary payment of player  
 922  $i$  to player  $j$ . At this strategy profile, the auctioneer runs the auction with bids  $\mathbf{b}$  and returns the  
 923 outcome (price and allocation), while the players make the monetary transfers  $\mathbf{t}$  to each other.

For each profile of monetary transfers  $\mathbf{t}$ , let  $m_i(\mathbf{t})$  be the net amount of money that player  $i$  gets  
 after all the transfers are made:

$$m_i(\mathbf{t}) = \sum_{j=1}^n t_{j,i} - \sum_{j=1}^n t_{i,j}.$$

The utility of player  $i$  at profile  $(\mathbf{b}, \mathbf{t})$  is

$$u_i(\mathbf{b}, \mathbf{t}) = m_i(\mathbf{t}) + \left( \sum_{j=1}^{x_i(\mathbf{b})} v_{i,j} \right) - p \cdot x_i(\mathbf{b}).$$

924 **Deviations.** Since in the case of auctions the actions (e.g. bids) of a group of players can affect the  
 925 utility of the players outside of the group, it is necessary to model how the players outside  $S$  react to  
 926 the deviation. Such reactions have been studied in the literature on the core with externalities (see,  
 927 e.g., [Koc07, Koc09]).

928 We consider neutral reactions, where non-deviators (i.e. players outside  $S$ ) have a mild reaction to  
 929 the deviation: they maintain the same bids as before the deviation and the monetary transfer of each  
 930 player  $i \in [n] \setminus S$  to each player  $j \in S$  is non-negative. The core where the deviators assume the non-  
 931 deviators will have neutral reactions to the deviation is known as the neutral core [SMR<sup>+</sup>13]. Several  
 932 other variants of the core exist, such as pessimistic core, where each deviator assumes that they will  
 933 be punished in the worst possible way by the non-deviators. Such variants are also interesting to  
 934 study, but next we focus on the basic case of neutral reactions.

935 A group of players will alternatively be called a *coalition*. The set of all players,  $[n]$ , will also be  
 936 called sometimes the grand coalition.

937 A group of players that agree on a deviation are known as a blocking coalition, formally defined  
 938 next.

939 **Definition 3** (Blocking coalition, with transfers). Let  $(\mathbf{b}, \mathbf{t})$  be a tuple of bids and monetary trans-  
940 fers. A group  $S \subseteq [n]$  of players is a blocking coalition if there exists a profile  $(\tilde{\mathbf{b}}, \tilde{\mathbf{t}})$ , at which each  
941 player  $i \in S$  weakly improves their utility, the improvement is strict for at least one player in  $S$ , and

- 942 •  $\tilde{b}_{i,j} = b_{i,j}$  if  $i \in [n] \setminus S, j \in [K]$ .
- 943 •  $\tilde{t}_{i,j} = 0$  if  $i \in [n] \setminus S$  and  $j \in S$ .

944 In other words, the blocking coalition  $S$  needs to agree on their bids and transfers to each other,  
945 such that they improve their utility when the players outside  $S$  maintain their existing bids but stop  
946 payments to players in  $S$ . In fact our characterization holds even if the players outside  $S$  make any  
947 non-negative transfers to the players in  $S$ ; the case where the transfers are zero is the extreme case.  
948 If a coalition  $S$  deviates with zero transfers from players outside  $S$ , it also deviates for any transfers  
949 that are non-negative.

950 **Definition 4** (The core with transfers). The core with transfers consists of profiles  $(\mathbf{b}, \mathbf{t})$  at which  
951 there are no blocking coalitions. Such profiles are core-stable.

952 **Theorem 6 (Core with transfers; restated)**. Consider  $K$  units and  $n > K$  hungry players. The  
953 core with transfers of the  $(K + 1)$ -st auction can be characterized as follows:

- 954 • Let  $(\mathbf{b}, \mathbf{t})$  be an arbitrary tuple of bids and transfers that is core stable. Then the allocation  
955  $\mathbf{x}(\mathbf{b})$  maximizes social welfare, the price is zero (i.e.  $p(\mathbf{b}) = 0$ ), and there are no transfers  
956 between the players (i.e.  $\mathbf{t} = 0$ ).

957 *Proof.* The proof has three steps as follows.

958 **Step I: core transfers are zero.** Assume towards a contradiction that  $(\mathbf{b}, \mathbf{t})$  is core stable and  
959  $\mathbf{t} \neq \mathbf{0}$ . Consider the directed weighted graph  $G = ([n], E, \mathbf{t})$ , where  $E$  consists of all the directed  
960 edges  $(i, j)$  and the weight of each edge is  $t_{i,j}$ . The net amount of money that each player  $i$  gets  
961 from transfers is  $m_i(\mathbf{t}) = \sum_{j=1}^n t_{j,i} - \sum_{j=1}^n t_{i,j}$ .

962 If there is a cycle  $C = (i_1, \dots, i_k)$  such that the payments along the cycle are strictly positive:  
963  $t_{i_1, i_2} > 0, \dots, t_{i_{k-1}, i_k} > 0$ , and  $t_{i_k, i_1} > 0$ , then some cancellations take place. That is, by subtract-  
964 ing  $\min\{t_{i_1, i_2}, \dots, t_{i_{k-1}, i_k}, t_{i_k, i_1}\}$  from the weight of each edge  $(i, j) \in C$ , we obtain a weighted  
965 directed graph without cycle  $C$  and where each player has the same net amount of money as in the  
966 original graph. Iterating the operation of removing cycles, we obtain a directed acyclic graph where  
967 the players have the same net amount of money as in the original graph.

968 Thus we can in fact assume the transfers  $\mathbf{t}$  are such that  $G$  is acyclic.

969 Consider a topological ordering  $(i_1, \dots, i_n)$  of the vertices of  $G$ . Let  $j$  be the minimum index for  
970 which vertex  $i_j$  has no incoming edges and at least one outgoing edge. Then  $m_{i_j}(\mathbf{t}) < 0$ . The utility  
971 of player  $i_j$  can be upper bounded as follows:

$$u_{i_j}(\mathbf{b}, \mathbf{t}) = m_{i_j}(\mathbf{t}) + \left( \sum_{k=1}^{x_{i_j}(\mathbf{b})} v_{i_j, k} \right) - p(\mathbf{b}) \cdot x_{i_j}(\mathbf{b}) < \left( \sum_{k=1}^{x_{i_j}(\mathbf{b})} v_{i_j, k} \right) - p(\mathbf{b}) \cdot x_{i_j}(\mathbf{b}).$$

972 We claim that player  $i_j$  has an improving deviation by keeping its bid vector  $\mathbf{b}_{i_j}$  and stopping all  
973 payments to other players. Since the other players have neutral reactions to the deviations, we obtain  
974 an outcome  $(\tilde{\mathbf{b}}, \tilde{\mathbf{t}})$  such that  $\tilde{\mathbf{b}} = \mathbf{b}$ ,  $\tilde{t}_{i_j, k} = 0$  for all  $k \in [n]$ , and  $\tilde{t}_{k, i_j} \leq t_{k, i_j}$  for all  $k \neq i_j$ . The  
975 gain of player  $i_j$  from the deviation can be bounded by:

$$\begin{aligned} u_{i_j}(\tilde{\mathbf{b}}, \tilde{\mathbf{t}}) - u_{i_j}(\mathbf{b}, \mathbf{t}) &= u_{i_j}(\tilde{\mathbf{b}}, \tilde{\mathbf{t}}) - u_{i_j}(\mathbf{b}, \mathbf{t}) && \text{(Since } \tilde{\mathbf{b}} = \mathbf{b}.) \\ &= \left[ m_{i_j}(\tilde{\mathbf{t}}) + \left( \sum_{k=1}^{x_{i_j}(\mathbf{b})} v_{i_j, k} \right) - p(\mathbf{b}) \cdot x_{i_j}(\mathbf{b}) \right] - \left[ m_{i_j}(\mathbf{t}) + \left( \sum_{k=1}^{x_{i_j}(\mathbf{b})} v_{i_j, k} \right) - p(\mathbf{b}) \cdot x_{i_j}(\mathbf{b}) \right] \\ &= m_{i_j}(\tilde{\mathbf{t}}) - m_{i_j}(\mathbf{t}) \\ &= -m_{i_j}(\mathbf{t}) && \text{(Since } m_{i_j}(\tilde{\mathbf{t}}) = 0.) \\ &> 0. && \text{(Since } m_{i_j}(\mathbf{t}) < 0 \text{ by choice of } i_j.) \end{aligned}$$

976 Thus player  $i_j$  has a strictly improving deviation, which contradicts the choice of  $(\mathbf{b}, \mathbf{t})$  as core-  
 977 stable with  $\mathbf{t} \neq \mathbf{0}$ . Thus the assumption must have been false. It follows that the only core stable  
 978 profiles (if any) have  $\mathbf{t} = \mathbf{0}$ .

979 **Step II: the social welfare is maximized.** Next we show that if  $(\mathbf{b}, \mathbf{t})$  is a core-stable outcome,  
 980 then the allocation induced by  $\mathbf{b}$  is welfare maximizing. Assume towards a contradiction this is not  
 981 the case. By Step I, we have  $\mathbf{t} = \mathbf{0}$ .

982 Let  $w_1 \geq \dots \geq w_{n \cdot K}$  be the bids sorted in decreasing order (breaking ties lexicographically) at the  
 983 truth-telling bid profile  $\mathbf{v}$ . For each  $j \in [n \cdot K]$ , let  $\pi_j$  be the player that submitted bid  $w_j$  in this  
 984 ordering.

985 Let  $\tilde{w}_1 \geq \dots \geq \tilde{w}_{n \cdot K}$  be the bids sorted in decreasing order (breaking ties lexicographically) at the  
 986 bid profile  $\mathbf{b}$ . Let  $\tilde{\pi}_j$  be the player that submitted bid  $\tilde{w}_j$  in this ordering.

987 Consider an undirected bipartite graph  $G = (L, R, E)$ , where  $L$  is the left part,  $R$  the right part, and  
 988  $E$  the set of edges. Define

- 989 •  $L = \{(i, j) \mid i \in [n], j \in [K], \text{ and } x_i(\mathbf{v}) \geq j\}$ . For example, if  $x_i(\mathbf{v}) = 2$ , then  $L$  has  
 990 nodes  $(i, 1)$  and  $(i, 2)$ . If on the other hand  $x_i(\mathbf{v}) = 0$ , then  $L$  has no nodes  $(i, j)$ , for any  
 991  $j$ .
- 992 •  $R = \{(i, j) \mid i \in [n], j \in [K], \text{ and } x_i(\mathbf{b}) \geq j\}$ .
- 993 •  $E = (s_1, s_2)$ , for all  $s_1 \in L$  and  $s_2 \in R$ .

994 Since both allocations  $\mathbf{x}(\mathbf{v})$  and  $\mathbf{x}(\mathbf{b})$  allocate exactly  $K$  units, we have  $|L| = |R| = K$ . Consider  
 995 now a graph  $G_1 = (L_1, R_1, E_1)$  obtained from  $G$  as follows. Set  $G = G_1$ . Then for each node  
 996  $(i, j) \in L$ : if the node also appears in  $R$ , then delete both copies of the node, together with any  
 997 edges containing them.

998 Thus in  $G_1$ , the left side  $L_1$  consists of nodes  $(i, j)$  with  $x_i(\mathbf{v}) \geq j$  but  $x_i(\mathbf{b}) < j$ . For each such  
 999 node  $(i, j)$ , let  $k$  be the rank of the valuation  $v_{i,j}$  in the ordering  $\pi$ . By definition of  $G_1$ , we have  
 1000 that  $R_1$  does not have any node of the form  $(i, s)$  for any  $s$ . To see this, observe that

- 1001 • nodes  $(i, s)$  with  $s < j$  were deleted when constructing  $G_1$  from  $G$ , and
- 1002 • nodes  $(i, s)$  with  $s \geq j$  do not exist even in  $G$  (if they did, then  $(i, j)$  would exist in both  $L$   
 1003 and  $R$  and so would have been deleted when constructing  $G_1$ ).

1004 Let  $d(i, j)$  be the player that displaces player  $i$ 's bid for the  $j$ -th unit at the bid profile  $\mathbf{b}$ . Formally,  
 1005  $d(i, j)$  is the owner of bid  $\tilde{w}_k$  when considering the bids  $\mathbf{b}$  in descending order. Let  $\omega(i, j) \in \mathbb{N}$  be  
 1006 such that player  $d(i, j)$  obtains an  $\omega(i, j)$ -th unit in their bundle at  $\mathbf{b}$ .

1007 Since  $x_i(\mathbf{b}) < j$ , we have  $i \neq d(i, j)$ . Since at the truth-telling profile player  $i$  gets a  $j$ -th unit  
 1008 but player  $d(i, j)$  does not get an  $\omega(i, j)$ -th unit, we have  $v_{i,j} \geq v_{d(i,j),\omega(i,j)}$ . Moreover, since the  
 1009 allocation  $\mathbf{x}(\mathbf{v})$  maximizes welfare but  $\mathbf{x}(\mathbf{b})$  does not, the inequality is strict for some  $(i, j) \in L_1$ .

1010 We claim that  $[n]$  is a blocking coalition. To show this, we will argue there is a bid profile  $\mathbf{b}^*$  and  
 1011 vector of transfers  $\mathbf{t}^*$  such that at  $(\mathbf{b}^*, \mathbf{t}^*)$  the utility of each player  $i \in [n]$  is weakly improved and  
 1012 the improvement is strict for at least one player. For each  $i \in [n], k \in [K]$ , let

$$b_{i,j}^* = \begin{cases} v_{i,j} & \text{if } x_i(\mathbf{v}) \geq j \\ 0 & \text{otherwise.} \end{cases}$$

1013 Then  $\mathbf{x}(\mathbf{b}^*) = \mathbf{x}(\mathbf{v})$  and  $p(\mathbf{b}^*) = 0$ . Also define monetary transfers  $\mathbf{t}^*$  as follows:

- 1014 • Initialize  $\mathbf{t}^* = \mathbf{0}$ . Let  $\varepsilon = \min_{(i,j) \in L_1} (v_{i,j} - v_{d(i,j),\omega(i,j)}) / 2$ . Then  $v_{i,j} \geq v_{d(i,j),\omega(i,j)} +$   
 1015  $\varepsilon$  for each  $(i, j) \in L_1$ .
- 1016 • For each  $(i, j) \in L_1$ , let  $t_{i,d(i,j)}^* := t_{i,d(i,j)}^* + v_{d(i,j),\omega(i,j)} + \varepsilon$ .

1017 Thus each player  $i$  that got a  $j$ -th unit in their bundle at the truth-telling profile did so because their  
 1018 bid for the  $j$ -th unit had rank  $k \leq K$ . Since  $i$  does not get the  $j$ -th unit at bid profile  $\mathbf{b}$ , there is a  
 1019 player  $d(i, j)$  whose bid for the  $j$ -th unit had rank  $k$  and who received this way a  $\omega(i, j)$ -th unit in  
 1020 their bundle.

1021 We argue that all the players weakly improve their utility at  $(\mathbf{b}^*, \mathbf{t}^*)$ , and the improvement is strict  
 1022 for at least one of them.

1023 • For each pair  $(i, j) \in L_1$ , under the bid profile  $\mathbf{b}^*$  player  $i$  receives the  $j$ -th unit at a cost of  
 1024 zero and transfers an amount of  $v_{d(i,j), \omega(i,j)} + \varepsilon$  to player  $d(i, j)$ .

1025 The component of the utility that player  $i$  gets from unit  $j$ , counting the value, price, and  
 1026 transfer related to unit  $j$ , is  $v_{i,j} - 0 - (v_{d(i,j), \omega(i,j)} + \varepsilon) \geq 0$ , where the inequality holds  
 1027 by choice of  $\varepsilon$ . This is a weak improvement compared to the utility that player  $i$  gets from  
 1028 unit  $j$  at profile  $(\mathbf{b}, \mathbf{0})$ , which is zero. Moreover, the improvement is strict for at least one  
 1029 pair  $(i, j) \in L_1$ , since the bid profile  $\mathbf{b}$  does not induce a welfare maximizing allocation.

1030 • For each pair  $(i, j) \in L \setminus L_1$ , at the profile  $(\mathbf{b}, \mathbf{0})$  player  $i$  gets utility  $v_{i,j} - p(\mathbf{b})$  from  
 1031 unit  $j$ , since it makes no transfers. At profile  $\mathbf{b}^*$ , player  $i$  gets unit  $j$  at a price of zero and  
 1032 makes no transfers (towards other players) related to unit  $j$ . Thus the component of the  
 1033 utility related to unit  $j$  is  $v_{i,j} - 0 - 0 = v_{i,j}$ . Since  $p(\mathbf{b}) \geq 0$ , we have  $v_{i,j} - p(\mathbf{b}) \leq v_{i,j}$ ,  
 1034 a weak improvement for player  $i$  with respect to unit  $j$ .

1035 • For each pair  $(i, j) \notin L$ : if  $(i, j) \notin R$ , then player  $i$  does not get a  $j$ -th unit under either  $\mathbf{b}$   
 1036 or  $\mathbf{b}^*$ , so its utility from unit  $j$  is zero at both profiles. If on the other hand  $(i, j) \in R$ , since  
 1037  $(i, j) \notin L$ , it must be that  $(i, j) \in R_1$ . At profile  $(\mathbf{b}, \mathbf{t})$  the utility of player  $i$  from unit  $j$   
 1038 is  $v_{i,j} - p(\mathbf{b})$  since it gets the unit and receives no transfers. At profile  $(\mathbf{b}^*, \mathbf{t}^*)$  player  $i$   
 1039 does not receive the unit but receives a transfer of  $v_{i,j} + \varepsilon$  from the player that gets the unit  
 1040 instead. This is again a weak improvement.

1041 Thus all players weakly improve their utility at  $(\mathbf{b}^*, \mathbf{t}^*)$  and the improvement is strict for at least  
 1042 one player, so the profile  $(\mathbf{b}, \mathbf{0})$  is not stable. This is a contradiction, thus the assumption that  $\mathbf{x}(\mathbf{b})$   
 1043 is not welfare maximizing must have been false.

1044 **Step III: the price is zero.** Next we show that if profile  $(\mathbf{b}, \mathbf{0})$  is core-stable, then  $p(\mathbf{b}) = 0$ . By  
 1045 Step II, the bid profile  $\mathbf{b}$  induces a welfare maximizing allocation.

1046 Suppose towards a contradiction that  $p(\mathbf{b}) > 0$ . Then we show there exists a blocking coalition.  
 1047 Let  $w_1 \geq \dots \geq w_{n \cdot K}$  be the bids sorted in decreasing order (breaking ties lexicographically) at bid  
 1048 profile  $\mathbf{b}$ . For each  $i \in [n \cdot K]$ , let  $\pi_i$  be the owner of bid  $w_i$ .

1049 We match the players as follows. Create a bipartite graph with left part  $L = (\pi_1, \dots, \pi_K)$  (allowing  
 1050 repetitions) and right part  $R = (\pi_{K+1}, \dots, \pi_{2K})$  (allowing repetitions). For each  $i \in [K]$ , create  
 1051 edge  $(\pi_i, \pi_{K+i})$ . Consider the profile  $(\mathbf{b}^*, \mathbf{t}^*)$ , where

$$b_{i,j}^* = \begin{cases} v_{i,j} & \text{if } x_i \geq j \\ 0 & \text{otherwise.} \end{cases}$$

1052 Define the transfers as follows:

1053 • Initialize  $\mathbf{t}^* = \mathbf{0}$ . Set  $\varepsilon = p/(2K)$ . For each  $i \in [K]$ , let player  $\pi_i$  pay an additional  
 1054 amount of  $\varepsilon$  to player  $\pi_{K+i}$ :  $t_{\pi_i, \pi_{K+i}}^* = t_{\pi_i, \pi_{K+i}}^* + \varepsilon$ .

1055 Then each player  $i$  with  $x_i(\mathbf{b}) > 0$  gets the same allocation at  $\mathbf{b}^*$  as at  $\mathbf{b}$ , but pays a price of zero for  
 1056 the units and makes a transfer of at most  $p/2$  to other players, resulting in improved utility compared  
 1057 to the utility at profile  $(\mathbf{b}, \mathbf{0})$ .

1058 On the other hand, each player  $i$  with  $x_i(\mathbf{b}) = 0$  on the other hand gets the same allocation at  $\mathbf{b}^*$   
 1059 as at  $\mathbf{b}$  (i.e. no units), but receives a non-negative amount of money from other players, and the net  
 1060 amount of money received is strictly positive for all the players  $\pi_{K+1}, \dots, \pi_{2K}$ .

1061 Thus there is an improving deviation, which contradicts the choice of  $(\mathbf{b}, \mathbf{t})$  as core-stable. Thus the  
 1062 assumption must have been false, and  $p(\mathbf{b}) = 0$ .  $\square$



1063 **D.2 Core without transfers**

1064 A strategy profile in this setting is described by a bid profile  $\mathbf{b}$ , where  $\mathbf{b}_i = (b_{i,1}, \dots, b_{i,K})$  is the  
 1065 bid vector of player  $i$ . In the setting without transfers, given a profile  $\mathbf{b}$  of bids, a blocking coalition  
 1066  $S$  needs to agree on simultaneously changing their bids, such that when the players outside  $S$  still  
 1067 bid according to  $\mathbf{b}$ , the players in  $S$  weakly improve their utility and the improvement is strict for at  
 1068 least one player in  $S$ .

1069 The core stable profiles are those that have no such blocking coalitions. Formally, we have:

1070 **Definition 5** (Blocking coalition, without transfers). *Let  $\mathbf{b}$  be a bid profile. A group  $S \subseteq [n]$  of*  
 1071 *players is a blocking coalition if there exists a bid profile  $\tilde{\mathbf{b}}$ , at which each player  $i \in S$  weakly*  
 1072 *improves their utility, the improvement is strict for at least one player in  $S$ , and  $\tilde{b}_{i,j} = b_{i,j}$  for all*  
 1073  *$i \in [n] \setminus S, j \in [K]$ .*

1074 **Definition 6** (The core with transfers). *The core with transfers consists of bid profiles  $\mathbf{b}$  at which*  
 1075 *there are no blocking coalitions. Such profiles are core-stable.*

1076 The non-transferable utility core can be characterized as follows.

1077

1078 **Theorem 5 (Core without transfers; restated).** *Consider  $K$  units and  $n > K$  hungry players. The*  
 1079 *core without transfers of the  $(K + 1)$ -st auction can be characterized as follows:*

- 1080 • every bid profile  $\mathbf{b}$  that is core stable has price zero (i.e.  $p(\mathbf{b}) = 0$ );
- 1081 • each allocation  $\mathbf{z}$  where all the units are allocated can be supported in a core stable bid
- 1082 profile  $\mathbf{b}$  with price zero (i.e.  $\mathbf{x}(\mathbf{b}) = \mathbf{z}$  and  $p(\mathbf{b}) = 0$ ).

1083 *Proof.* The proof is in two parts.

1084 **Part I: the price in the core is zero.** Consider a bid profile  $\mathbf{b}$  that is core-stable. Suppose towards  
 1085 a contradiction that  $p(\mathbf{b}) > 0$ .

1086 Let  $M = \sum_{\ell_1=1}^n \sum_{\ell_2=1}^K v_{\ell_1, \ell_2}$ . Define a bid profile  $\tilde{\mathbf{b}}$  such that for all  $i \in [n], j \in [K]$ :

$$\tilde{b}_{i,j} = \begin{cases} M & \text{if } j \leq x_i(\mathbf{b}) \\ \varepsilon & \text{otherwise.} \end{cases} \quad (34)$$

1087 At  $\tilde{\mathbf{b}}$ , the players only submit bids equal to  $M > 0$  for the units they are supposed to get at allocation  
 1088  $\mathbf{x}(\tilde{\mathbf{b}})$ , and moreover, there are exactly  $K$  strictly positive bids. Thus  $\mathbf{x}(\tilde{\mathbf{b}}) = \mathbf{x}(\mathbf{b})$ . Moreover,  
 1089  $p(\tilde{\mathbf{b}}) = 0$  since the  $(K + 1)$ -st highest bid is 0.

1090 Then the grand coalition  $C = [n]$  is blocking with the profile  $\tilde{\mathbf{b}}$ , in contradiction with  $\mathbf{b}$  being core  
 1091 stable. Thus the assumption must have been false, so  $p(\mathbf{b}) = 0$ .

1092 **Part II: every allocation can be implemented at a core-stable bid profile.** Let  $\mathbf{z}$  be an arbitrary  
 1093 allocation at which all the units are allocated.

1094 Define  $\mathbf{b}$  such that for all  $i \in [n], j \in [K]$ , we have  $b_{i,j} = M$  if  $j \leq z_i$  and  $b_{i,j} = 0$  otherwise. Then  
 1095  $\mathbf{x}(\mathbf{b}) = \mathbf{z}$  and  $p(\mathbf{b}) = 0$ . Let  $W = \{i \in [n] \mid z_i > 0\}$  be the set of “winners” at  $\mathbf{b}$ .

1096 Assume towards a contradiction that  $\mathbf{b}$  is not stable. Then there is a blocking coalition  $C =$   
 1097  $\{i_1, \dots, i_k\} \subseteq [n]$  with alternative bid profile  $\mathbf{d} = (\mathbf{d}_{i_1}, \dots, \mathbf{d}_{i_k})$ . Denote  $\tilde{\mathbf{b}} = (\mathbf{d}, \mathbf{b}_{-C})$  the  
 1098 profile where each player  $i \in C$  bids  $\tilde{\mathbf{b}}_i = \mathbf{d}_i$  and each player  $i \notin C$  bids  $\tilde{\mathbf{b}}_i = \mathbf{b}_i$ . We must have  
 1099  $u_i(\tilde{\mathbf{b}}) \geq u_i(\mathbf{b})$  for all  $i \in C$ , with strict inequality for some player  $i \in C$ .

1100 If  $C \cap W = \emptyset$ , then the only way for at least one of the players in  $C$  to change their allocation is to  
 1101 make some of their bids at least  $H$ . But this increases the price from zero to at least  $H$ , which yields  
 1102 negative utility for everyone. Thus  $C \cap W \neq \emptyset$ . We consider two cases:

1103 1. Case  $p(\tilde{\mathbf{b}}) > 0$ . Each player  $i \in C \cap W$  requires strictly more units at  $\tilde{\mathbf{b}}$  than at  $\mathbf{b}$ ,  
 1104 to compensate for the higher price at  $\tilde{\mathbf{b}}$ . Thus  $\mathbf{x}_i(\tilde{\mathbf{b}}) > z_i$  for all  $i \in C \cap W$  ( $\dagger$ ). If  
 1105  $x_i(\tilde{\mathbf{b}}_i) < z_i$  for some player  $i \in W \setminus C$ , there would have to exist at least  $K + 1$  bids with  
 1106 value at least  $H$ , and so  $p(\tilde{\mathbf{b}}) \geq H$ , which would give negative utility to all the players  
 1107 including the deviators. Thus  $x_i(\tilde{\mathbf{b}}_i) \geq z_i$  for all  $i \in W \setminus C$  ( $\ddagger$ ).

Combining ( $\dagger$ ) and ( $\ddagger$ ) gives a contradiction:

$$\sum_{i \in C \cup (W \setminus C)} x_i(\tilde{\mathbf{b}}) > \sum_{i \in C \cup (W \setminus C)} z_i = K.$$

1108 Thus  $p(\tilde{\mathbf{b}}) > 0$  cannot hold.

1109 2. Case  $p(\mathbf{b}) = 0$ . Then each player  $i \in C \cap W$  requires  $u_i(\tilde{\mathbf{b}}) \geq z_i$ . Since  $p(\tilde{\mathbf{b}}) = 0$ , the top  
 1110  $K$  bids are strictly positive and the remaining bids are zero. Then each player  $i \in C \cap W$   
 1111 submits exactly  $z_i$  strictly positive bids. It follows that  $\mathbf{x}_i(\tilde{\mathbf{b}}) = \mathbf{x}_i(\mathbf{b})$  and  $p(\tilde{\mathbf{b}}) = p(\mathbf{b})$  for  
 1112 each  $i \in [n]$ , which means no player in  $C$  strictly improves. Thus  $C$  cannot be blocking.

1113 In both cases 1 and 2 we obtained a contradiction, so  $\mathbf{b}$  is core-stable,  $p(\mathbf{b}) = 0$ , and  $\mathbf{x}(\mathbf{b}) = \mathbf{z}$  as  
 1114 required.  $\square$

## 1115 E Theorems from prior work

1116 In this section we include the theorem from [CBL06] that we use. In the problem of prediction under  
 1117 expert advice, there are  $N$  experts in total, and at each round  $t \in [T]$ :

- 1118 • learner chooses a probability distribution  $p_t$  over  $[N]$ ;
- 1119 • nature reveals the losses  $\{\ell_{t,i}\}_{i \in [N]}$  of all experts at time  $t$ , where  $\ell_{t,i} \in [0, L]$ .

1120 For a given sequence of probability distributions  $(p_1, \dots, p_T)$ , the learner's regret is defined to be

$$\text{Reg}(T, (p_1, \dots, p_T)) = \sum_{t=1}^T \sum_{i=1}^N p_t(i) \ell_{t,i} - \min_{i^* \in [N]} \sum_{t=1}^T \ell_{t,i^*}.$$

1121 For this problem, the exponentially weighted average forecaster, also known as the Hedge algorithm,  
 1122 is defined as follows. The algorithm initializes  $p_1 = \sigma$ , an arbitrary prior distribution over the experts  
 1123  $[N]$  such that each expert  $i$  is selected with probability  $\sigma_i > 0$ . For  $t \geq 2$ , the forecaster updates

$$p_t(i) = \frac{p_{t-1}(i) \exp(-\eta \ell_{t-1,i})}{\sum_{j=1}^N p_{t-1}(j) \exp(-\eta \ell_{t-1,j})}, \quad \forall i \in [N],$$

1124 where  $\eta > 0$  is a learning rate.

1125 Next we include the statement of Theorem 2.2 of [CBL06] in our notation.

1126 **Theorem 7** (Theorem 2.2 of [CBL06]). *Consider the exponentially weighted average forecaster*  
 1127 *with  $N$  experts, learning rate  $\eta > 0$ , time horizon  $T$ , and rewards in  $[0, 1]$ . Suppose the initial*  
 1128 *distribution  $\sigma$  on the experts is uniform, that is,  $\sigma = (1/N, \dots, 1/N)$ . The regret of the forecaster*  
 1129 *is*

$$\text{Reg}(T, (p_1, \dots, p_T)) \leq \frac{\log N}{\eta} + \frac{T\eta}{8}.$$

1130 The following corollary is a well known variant of the above theorem, to allow rewards in an interval  
 1131  $[0, L]$  and an arbitrary initial distribution  $\sigma$  over the experts.

1132 **Corollary 1.** *Consider the exponentially weighted average forecaster with  $N$  experts, learning rate*  
 1133  *$\eta > 0$ , time horizon  $T$ , and rewards in  $[0, L]$ . Suppose the initial distribution on the experts is  $\sigma$ .*  
 1134 *The regret of the forecaster is*

$$\text{Reg}(T, (p_1, \dots, p_T)) \leq \frac{1}{\eta} \max_{i \in [N]} \log \left( \frac{1}{\sigma_i} \right) + \frac{TL^2\eta}{8}.$$

1135 The proof of Corollary 1 is identical to that of Theorem 7, except for the following two differences:

- 1136 • Instead of  $W_t = \sum_{i=1}^N \exp(-\eta \sum_{s \leq t} \ell_{s,i})$ , we define  $W_t = \sum_{i=1}^N \sigma_i \exp(-\eta \sum_{s \leq t} \ell_{s,i})$ .  
1137 In this way,

$$\log \frac{W_T}{W_0} = \log W_T \geq -\eta \min_{i^* \in [N]} \sum_{t=1}^T \ell_{t,i^*} - \max_{i \in [N]} \log \frac{1}{\sigma_i}.$$

- 1138 • When applying [CBL06, Lemma 2.2], we use the interval for the rewards as  $[0, L]$  instead  
1139 of  $[0, 1]$ .
